# Supplementary material
Source: HighWire-hosted journal article supplement (https://bmjopen.bmj.com/content/11/2/e041648)
Supplement: inline-supplementary-material-1 [file inline-supplementary-material-1.pdf]

**Supplementary file**

*Provincial/territorial range of % change difference (2013-14 vs. 2017-18), mean % change (and 95% Confidence Intervals), combined Teaching and Community-Large hospitals*

| Province/territory        | Indicator                           | Range of % change (2013-14 vs. 2017-18) | Mean % change (95% CI) |
|---------------------------|-------------------------------------|-----------------------------------------|------------------------|
| Alberta                   | All Patients Readmitted to Hospital | -6 to 17                                | 3.1 (-0.7 to 6.9)      |
|                           | Hospital Deaths (HSMR)              | -21 to 22                               | -0.7 (-9.3 to 7.9)     |
| British Columbia          | All Patients Readmitted to Hospital | -12 to 12                               | 1.9 (-1.2 to 5)        |
|                           | Hospital Deaths (HSMR)              | -33 to 11                               | -6.5 (-11.4 to -1.6)   |
| Manitoba                  | All Patients Readmitted to Hospital | 3 to 10                                 | 6.7 (-2.1 to 15.4)     |
|                           | Hospital Deaths (HSMR)              | -13 to 12                               | -1.3 (-32.6 to 29.9)   |
| New Brunswick             | All Patients Readmitted to Hospital | -8 to 2                                 | -3.2 (-11.2 to 4.7)    |
|                           | Hospital Deaths (HSMR)              | -11 to 10                               | -2.5 (-16.8 to 11.8)   |
| Newfoundland and Labrador | All Patients Readmitted to Hospital | 1 to 10                                 | 5.5 (-51.7 to 62.7)    |
|                           | Hospital Deaths (HSMR)              | -6 to 6                                 | 0.0 (-76.2 to 76.2)    |
| Nova Scotia               | All Patients Readmitted to Hospital | -4 to 11                                | 3.5 (-91.8 to 98.8)    |
|                           | Hospital Deaths (HSMR)              | 1 to 21                                 | 11.0 (-116.1 to 138.1) |
| Ontario                   | All Patients Readmitted to Hospital | -14 to 9                                | 0.9 (-1 to 2.8)        |
|                           | Hospital Deaths (HSMR)              | -24 to 8                                | -5.8 (-9.2 to -2.5)    |
| Prince Edward Island*     | All Patients Readmitted to Hospital | -5 to -5                                | N/A                    |
|                           | Hospital Deaths (HSMR)              | -22 to -22                              | N/A                    |
| Quebec                    | All Patients Readmitted to Hospital | 1 to 9                                  | 4.8 (1.8 to 7.8)       |
|                           | Hospital Deaths (HSMR)              | -21 to -1                               | -12.0 (-19.5 to -4.5)  |
| Saskatchewan              | All Patients Readmitted to Hospital | -2 to 3                                 | 0.8 (-2.5 to 4)        |
|                           | Hospital Deaths (HSMR)              | -11 to -5                               | -7.8 (-11.7 to -3.8)   |

\*Only one hospital value.

***Subset of hospitals (n=81), with both Readmission and Hospital Deaths (HSMR) values, used in performance trends over time analysis***

| Provincial/territorial jurisdiction | Community — large hospitals | Teaching hospitals | Jurisdiction total |
|-------------------------------------|-----------------------------|--------------------|--------------------|
| Alberta                             | 4                           | 7                  | 11                 |
| British Columbia                    | 11                          | 6                  | 17                 |
| Manitoba                            | 1                           | 2                  | 3                  |
| New Brunswick                       | 3                           | 1                  | 4                  |
| Newfoundland and Labrador           | 1                           | 1                  | 2                  |
| Nova Scotia                         | 1                           | 1                  | 2                  |
| Ontario                             | 21                          | 10                 | 31                 |
| Prince Edward Island                | 1                           | 0                  | 1                  |
| Quebec                              | 2                           | 4                  | 6                  |
| Saskatchewan                        | 0                           | 4                  | 4                  |
| <b>Total</b>                        | <b>45</b>                   | <b>36</b>          | <b>81</b>          |

***Facility characteristic averages by hospital peer-groups***

| Facility characteristic                                | Unit           | Mean value, (n of hospitals) |                             |
|--------------------------------------------------------|----------------|------------------------------|-----------------------------|
|                                                        |                | Teaching hospitals           | Community – Large hospitals |
| Number of Acute Care Hospital Stays                    | # of days      | 27,322 (n=53)                | 20,421 (n=66)               |
| Number of Acute Care Beds                              | # of beds      | 474 (n=53)                   | 328 (n=66)                  |
| Number of Emergency Department Visits                  | # of visits    | 83,441 (n=40)                | 86,962 (n=43)               |
| Average Acute Care Resource Intensity Weight (RIW)     | average RIW    | 1.6 (n=53)                   | 1.2 (n=66)                  |
| Total Acute Care RIW                                   | total RIW      | 43,295 (n=53)                | 25,057 (n=66)               |
| Hospital Occupancy Rate                                | % of occupancy | 88.9 (n=44)                  | 89.9 (n=61)                 |
| Patients Admitted Through the Emergency Department (%) | % of patients  | 44.4 (n=53)                  | 54.4 (n=66)                 |
| Patient Days in Alternate Level of Care (Percentage)   | %              | 11.4 (n=43)                  | 15.4 (n=53)                 |

**Correlation matrix (scatterplot) of both Teaching and Community-Large hospitals****Teaching hospitals, Community — large hospitals**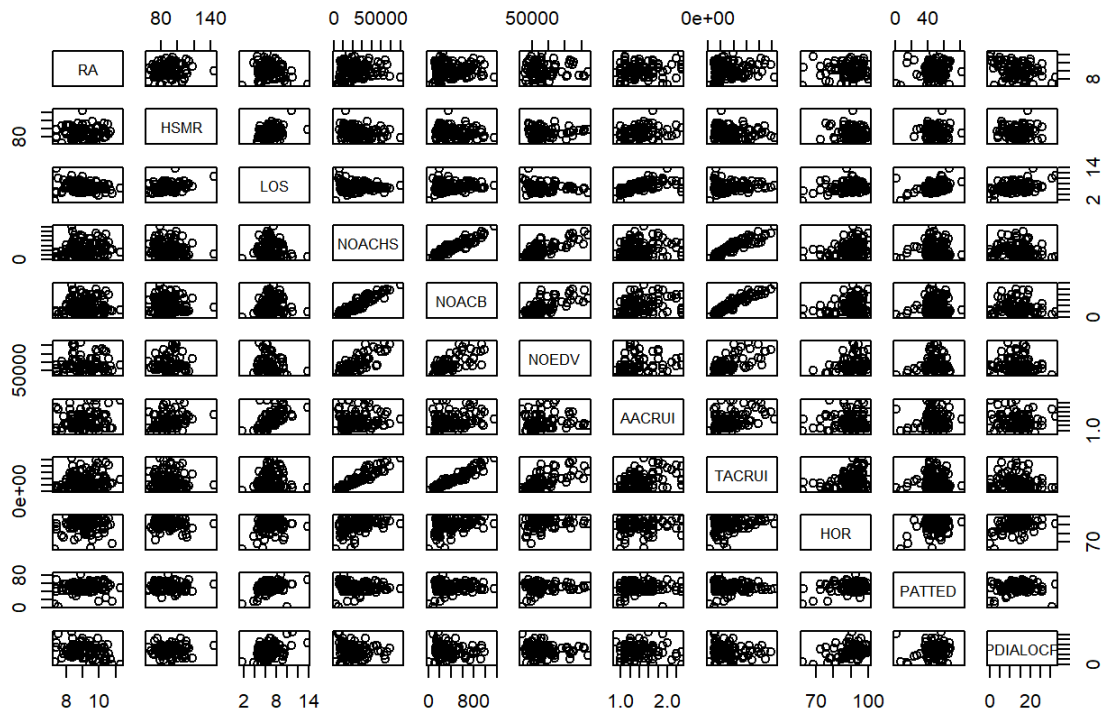

Indicator acronyms: All Patients Readmitted to Hospital (RA); Hospital Deaths (HSMR); Average Length of Stay (LOS); Number of Acute Care Hospital Stays (NOACHS); Number of Acute Care Beds (NOACB); Number of Emergency Department Visits (NOEDV); Average Acute Care Resource Intensity Weight (AACRUI); Total Acute Care Resource Intensity Weight (TACRUI); Hospital Occupancy Rate (HOR); Patients Admitted Through the Emergency Department (%) (PATTED); Patient Days in Alternate Level of Care (Percentage) (PDIALOCP).

**Correlation matrix (scatterplot) of Teaching hospitals**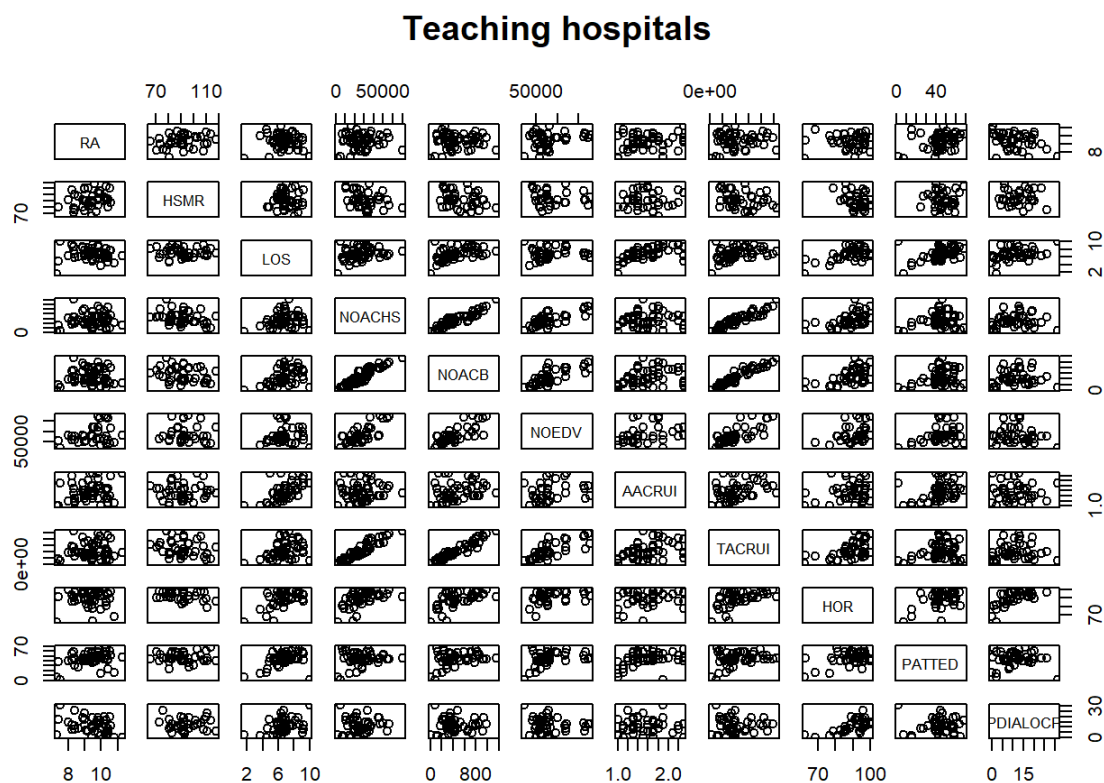

Indicator acronyms: All Patients Readmitted to Hospital (RA); Hospital Deaths (HSMR); Average Length of Stay (LOS); Number of Acute Care Hospital Stays (NOACHS); Number of Acute Care Beds (NOACB); Number of Emergency Department Visits (NOEDV); Average Acute Care Resource Intensity Weight (AACRUI); Total Acute Care Resource Intensity Weight (TACRUI); Hospital Occupancy Rate (HOR); Patients Admitted Through the Emergency Department (%) (PATTED); Patient Days in Alternate Level of Care (Percentage) (PDIALOCP).

**Correlation matrix (scatterplot) of Community-Large hospitals**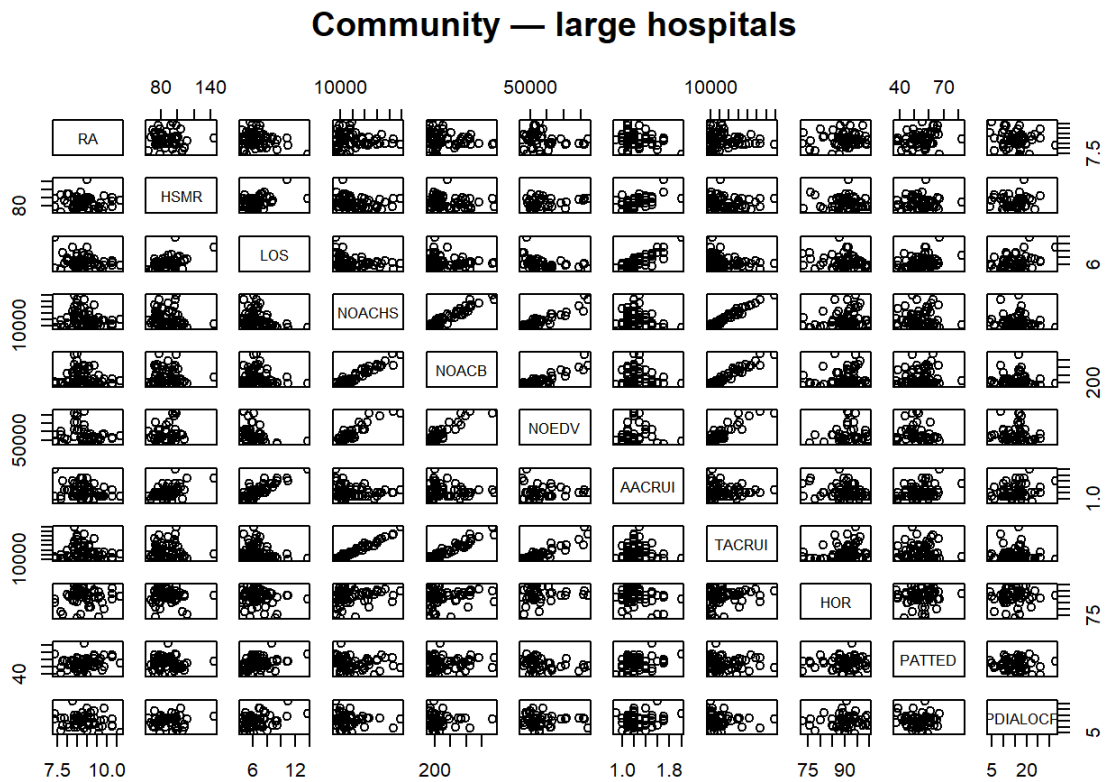

Indicator acronyms: All Patients Readmitted to Hospital (RA); Hospital Deaths (HSMR); Average Length of Stay (LOS); Number of Acute Care Hospital Stays (NOACHS); Number of Acute Care Beds (NOACB); Number of Emergency Department Visits (NOEDV); Average Acute Care Resource Intensity Weight (AACRUI); Total Acute Care Resource Intensity Weight (TACRUI); Hospital Occupancy Rate (HOR); Patients Admitted Through the Emergency Department (%) (PATTED); Patient Days in Alternate Level of Care (Percentage) (PDIALOCP).
